# Supplementary material for: The interplay of stiffness and force anisotropies drives embryo elongation
Source: eLife journal article supplement (doi:10.7554/elife.23866), 2017-02-09
Supplement: supp [file elife-23866-supp-v1.zip]

Archive with 11 entries (11 files):
- elife_poa_e23866_Supplementary_Movie_3.avi
- elife_poa_e23866_Supplementary_Movie_1.avi
- elife_poa_e23866_Supplementary_Movie_2.avi
- elife_poa_e23866_Supplementary_Movie_4.avi
- elife_poa_e23866_Supplementary_Information.pdf
- elife_poa_e23866_Supplementary_File_3.docx
- elife_poa_e23866_Figure_2_figure_supplement_1.tif
- elife_poa_e23866_Figure_3_figure_supplement_1.tif
- elife_poa_e23866_Figure_2_figure_supplement_2.tif
- elife_poa_e23866_Supplementary_File_2.docx
- elife_poa_e23866_Supplementary_File_1.docx
