# Supplementary material for: The interplay of stiffness and force anisotropies drives embryo elongation
Source: eLife journal article supplement (doi:10.7554/elife.23866), 2017-02-09
Supplement: supp [file elife-23866-supp-v1.zip › elife_poa_e23866_Supplementary_File_1.docx]

| **Sample** | **Number of embryos** | **Sample** | **Number of embryos** |
| --- | --- | --- | --- |
| **H1 1.3F DV** | 20 | ***spc-1(RNAi)* H1 1.7F DV** | 18 |
| **H1 1.3F AP** | 22 | ***spc-1(RNAi)* H1 1.7F AP** | 16 |
| **V3 1.3F DV** | 27 | ***unc-112(RNAi)* H1 1.7F DV** | 26 |
| **V3 1.3F AP** | 22 | ***unc-112(RNAi)* H1 1.7F AP** | 27 |
| **V6 1.3F DV** | 16 | **HYP7-Dorsal 1.3F DV** | 17 |
| **V6 1.3F AP** | 16 | **HYP7-Dorsal 1.3F AP** | 6 |
| **H1 1.5F DV** | 46 | **HYP7-Ventral 1.3F DV** | 18 |
| **H1 1.5F AP** | 47 | **HYP7-Ventral 1.3F AP** | 19 |
| **V3 1.5F DV** | 27 | **HYP7-Dorsal 1.5F DV** | 25 |
| **V3 1.5F AP** | 28 | **HYP7-Dorsal 1.5F AP** | 15 |
| **V6 1.5F DV** | 26 | **HYP7-Ventral 1.5F DV** | 23 |
| **V6 1.5F AP** | 25 | **HYP7-Ventral 1.5F DV** | 31 |
| **H1 1.7F DV** | 49 | **HYP7 1.7F DV** | 23 |
| **H1 1.7F AP** | 43 | **HYP7 1.7F AP** | 9 |
