# Supplementary figures and images for: The interplay of stiffness and force anisotropies drives embryo elongation
Source: eLife journal article supplement (doi:10.7554/elife.23866), 2017-02-09

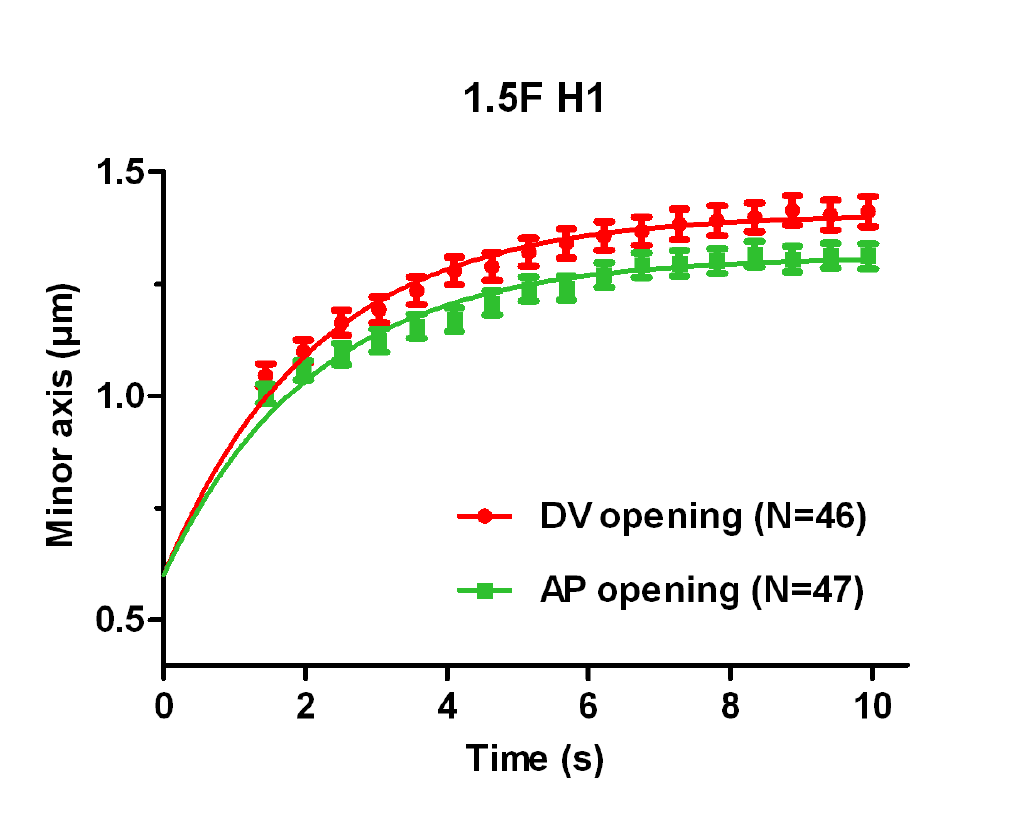

Supplement: supp [file elife-23866-supp-v1.zip › elife_poa_e23866_Figure_2_figure_supplement_1.tif]

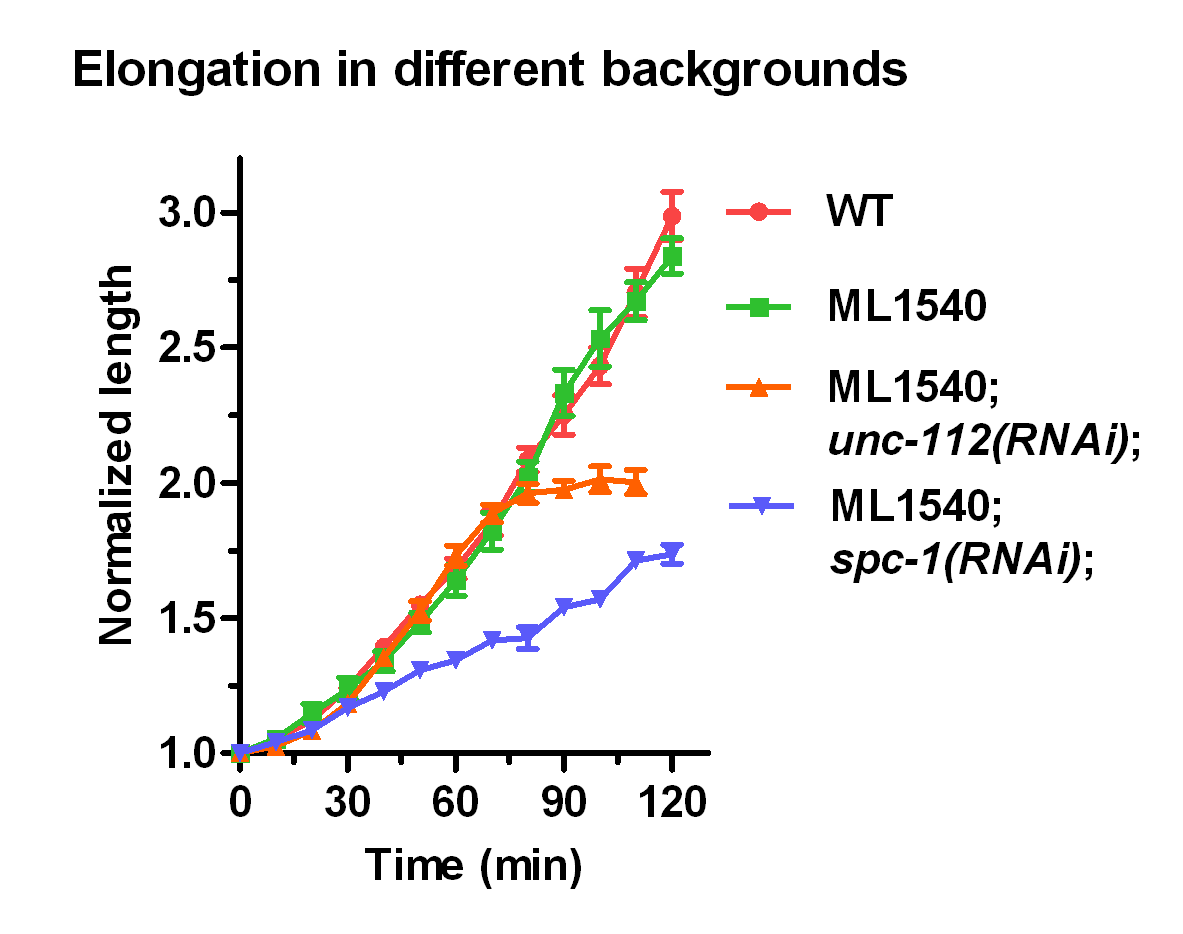

Supplement: supp [file elife-23866-supp-v1.zip › elife_poa_e23866_Figure_3_figure_supplement_1.tif]

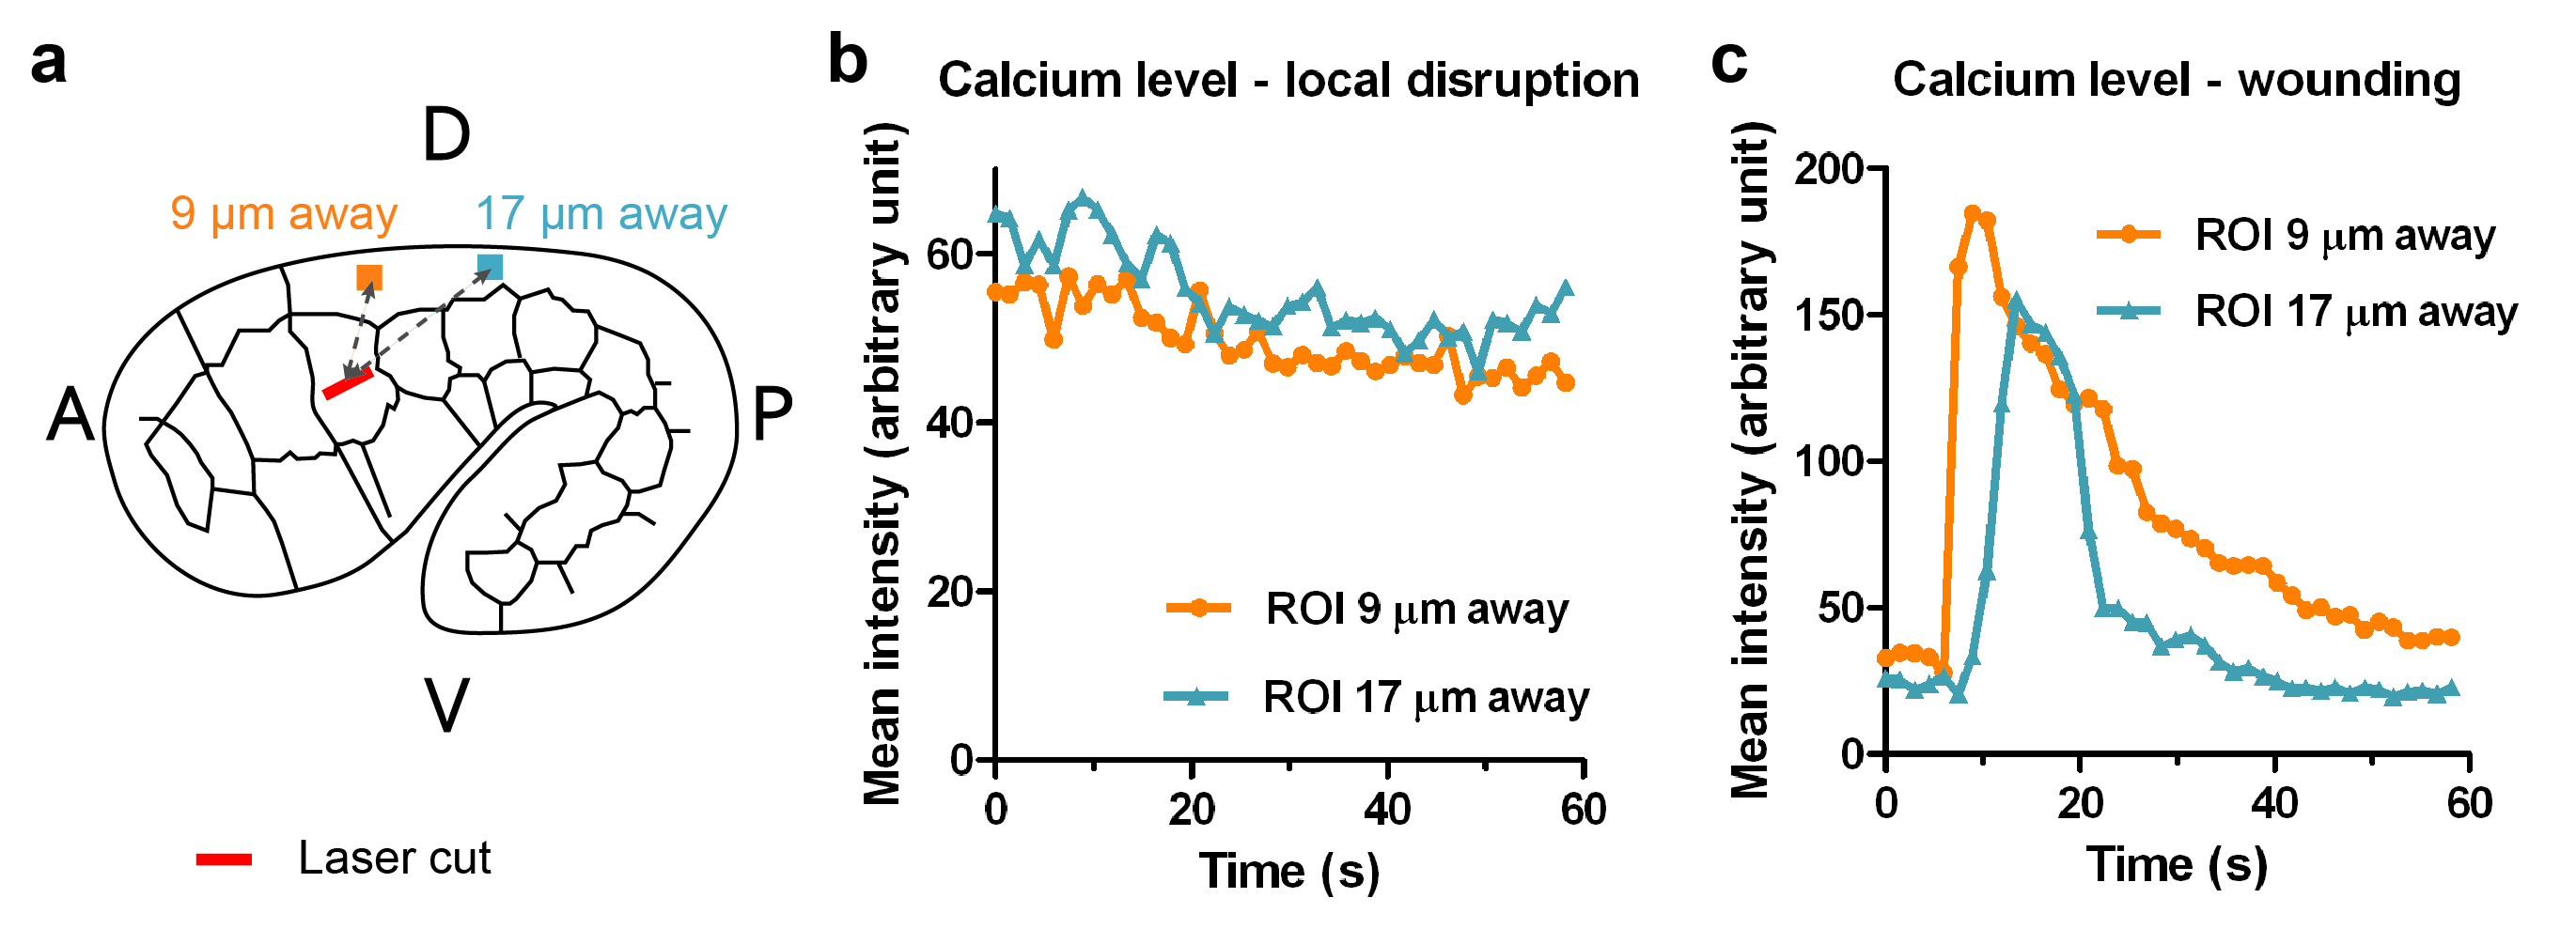

Supplement: supp [file elife-23866-supp-v1.zip › elife_poa_e23866_Figure_2_figure_supplement_2.tif]
